# Supplementary material for: Enhanced visible-light photocatalytic activity of a g-C3N4/BiVO4nanocomposite: a first-principles study
Source: Royal Society of Chemistry journal article supplement (doi:10.1039/c4cp06089j), 2015-01-01
Supplement: c4cp06089j1.pdf [file c4cp06089j1.pdf]

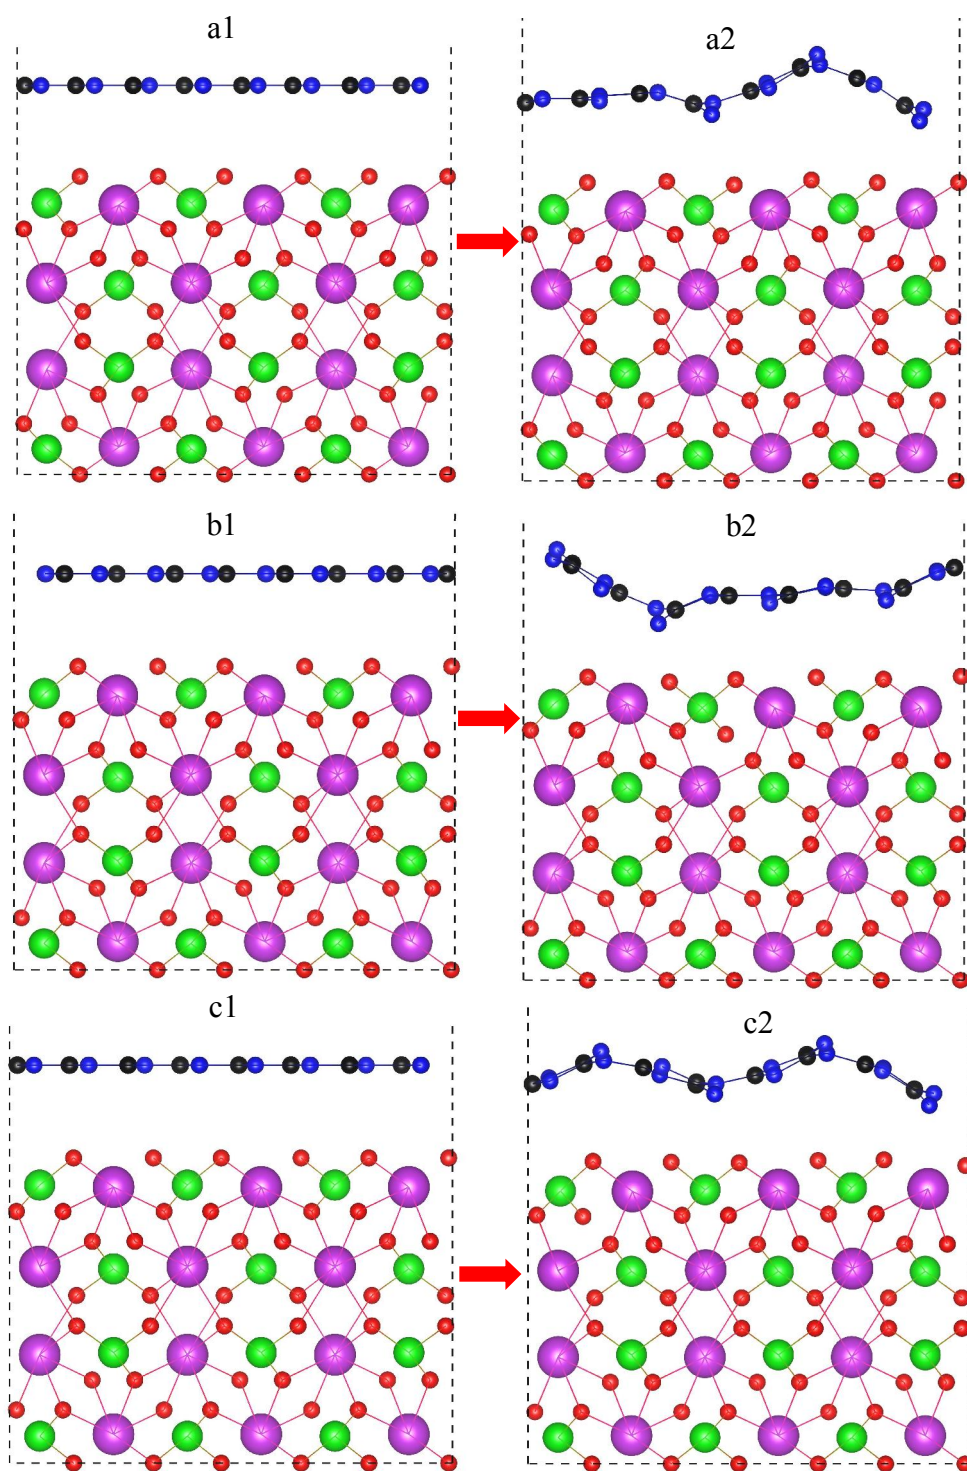

Fig S1 (color online) Models for the g-C<sub>3</sub>N<sub>4</sub>(001)/BiVO<sub>4</sub>(010) nanocomposite before geometry optimization ( a1, b1, c1 ) and after geometry optimization ( a2, b2, c2 ). The black, blue, green, red, and purple spheres represent C, N, V, O, and Bi atoms, respectively.

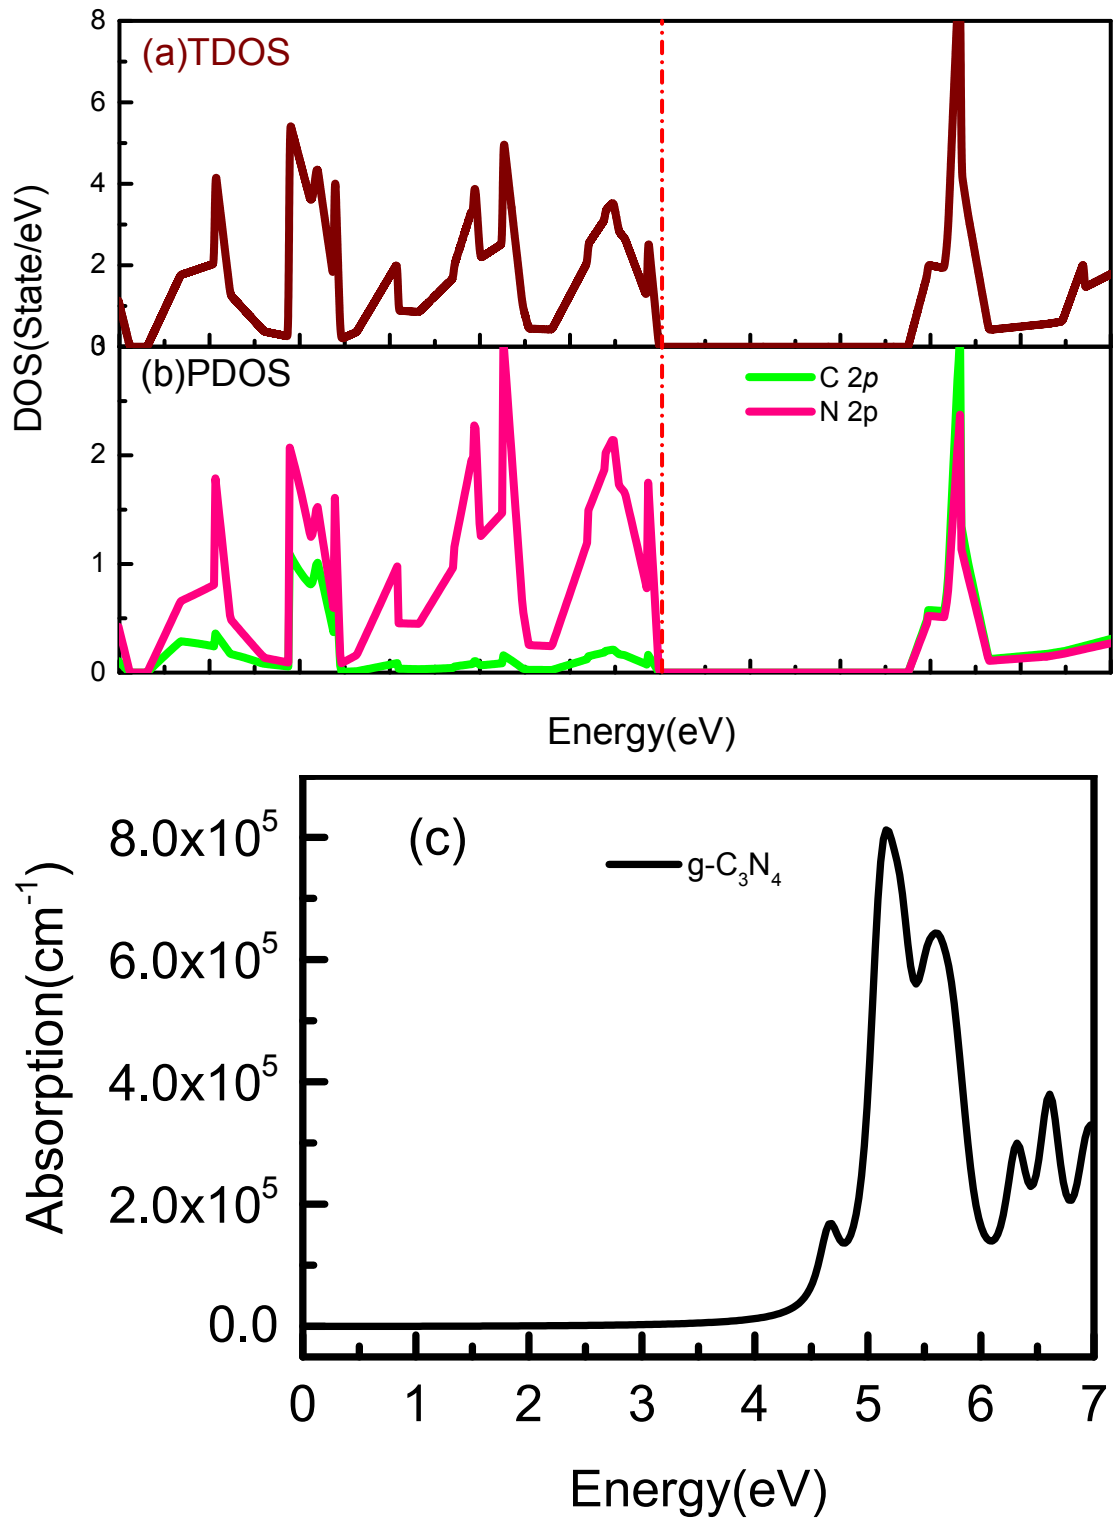

Fig. S2 The TDOS (a), PDOS (b), and absorption coefficients of g-C<sub>3</sub>N<sub>4</sub>, from HSE06 hybrid exchange functional calculations. The Fermi level is indicated by the short dash dot line.
